# Supplementary material
Source: PubMed Central journal article supplement (PMC8233662)
Supplement: mmc1.pdf [file mmc1.pdf]

**Cell Reports Medicine, Volume 2**

**Supplemental information**

**Landscape of epitopes targeted by T cells  
in 852 individuals recovered from COVID-19:**

**Meta-analysis, immunoprevalence, and web platform**

**Ahmed Abdul Quadeer, Syed Faraz Ahmed, and Matthew R. McKay**

# Supplemental Information

## Landscape of epitopes targeted by T cells in 852 convalescent COVID-19 patients: Meta-analysis, immunoprevalence and web platform

Ahmed Abdul Quadeer,<sup>1,\*</sup> Syed Faraz Ahmed,<sup>1</sup> and Matthew R. McKay<sup>1,2,3,\*</sup>

<sup>1</sup>Department of Electronic and Computer Engineering, The Hong Kong University of Science and Technology, Clear Water Bay, Hong Kong SAR, China

<sup>2</sup>Department of Chemical and Biological Engineering, The Hong Kong University of Science and Technology, Clear Water Bay, Hong Kong SAR, China

<sup>3</sup>Lead contact

\*Correspondence: [eeaaquadeer@ust.hk](mailto:eeaaquadeer@ust.hk) (A.A.Q.) and [m.mckay@ust.hk](mailto:m.mckay@ust.hk) (M.R.M.)

## SUPPLEMENTAL FIGURES

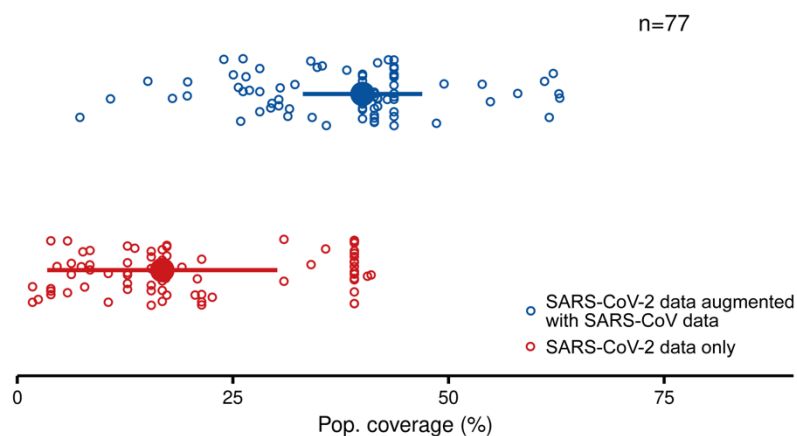

**Figure S1. Estimated global population coverage of SARS-CoV-2 epitopes after augmenting HLA alleles associated with genetically-matched SARS-CoV epitopes. Related to Figure 1E.** For 90 of the 711 experimentally-determined SARS-CoV-2 T cell epitopes, both epitope sequence and associated HLA alleles matched exactly with those of experimentally-determined SARS-CoV epitopes. This suggests that an epitope-HLA pair associated with a T cell response for one virus is likely to be associated with a response for the other<sup>1,2</sup>, and hence any additional HLA associations known for SARS-CoV epitopes<sup>3,4</sup> could augment the limited information available for SARS-CoV-2. Based on this rationale, additional HLA alleles from SARS-CoV data were identified for 77 of the 90 genetically-matched SARS-CoV-2 epitopes. For these 77 epitopes, the median population coverage significantly increased from 16.8% to 40.3% after augmenting HLA alleles from SARS-CoV data. Specific SARS-CoV-2 epitopes, such as <sup>66</sup>FPRGQGVPI<sub>74</sub> in N and <sup>171</sup>ATSRTL<sup>179</sup>SY in M, were estimated to cover a high percentage of global population (~60%) after data augmentation (Supplementary File S1).

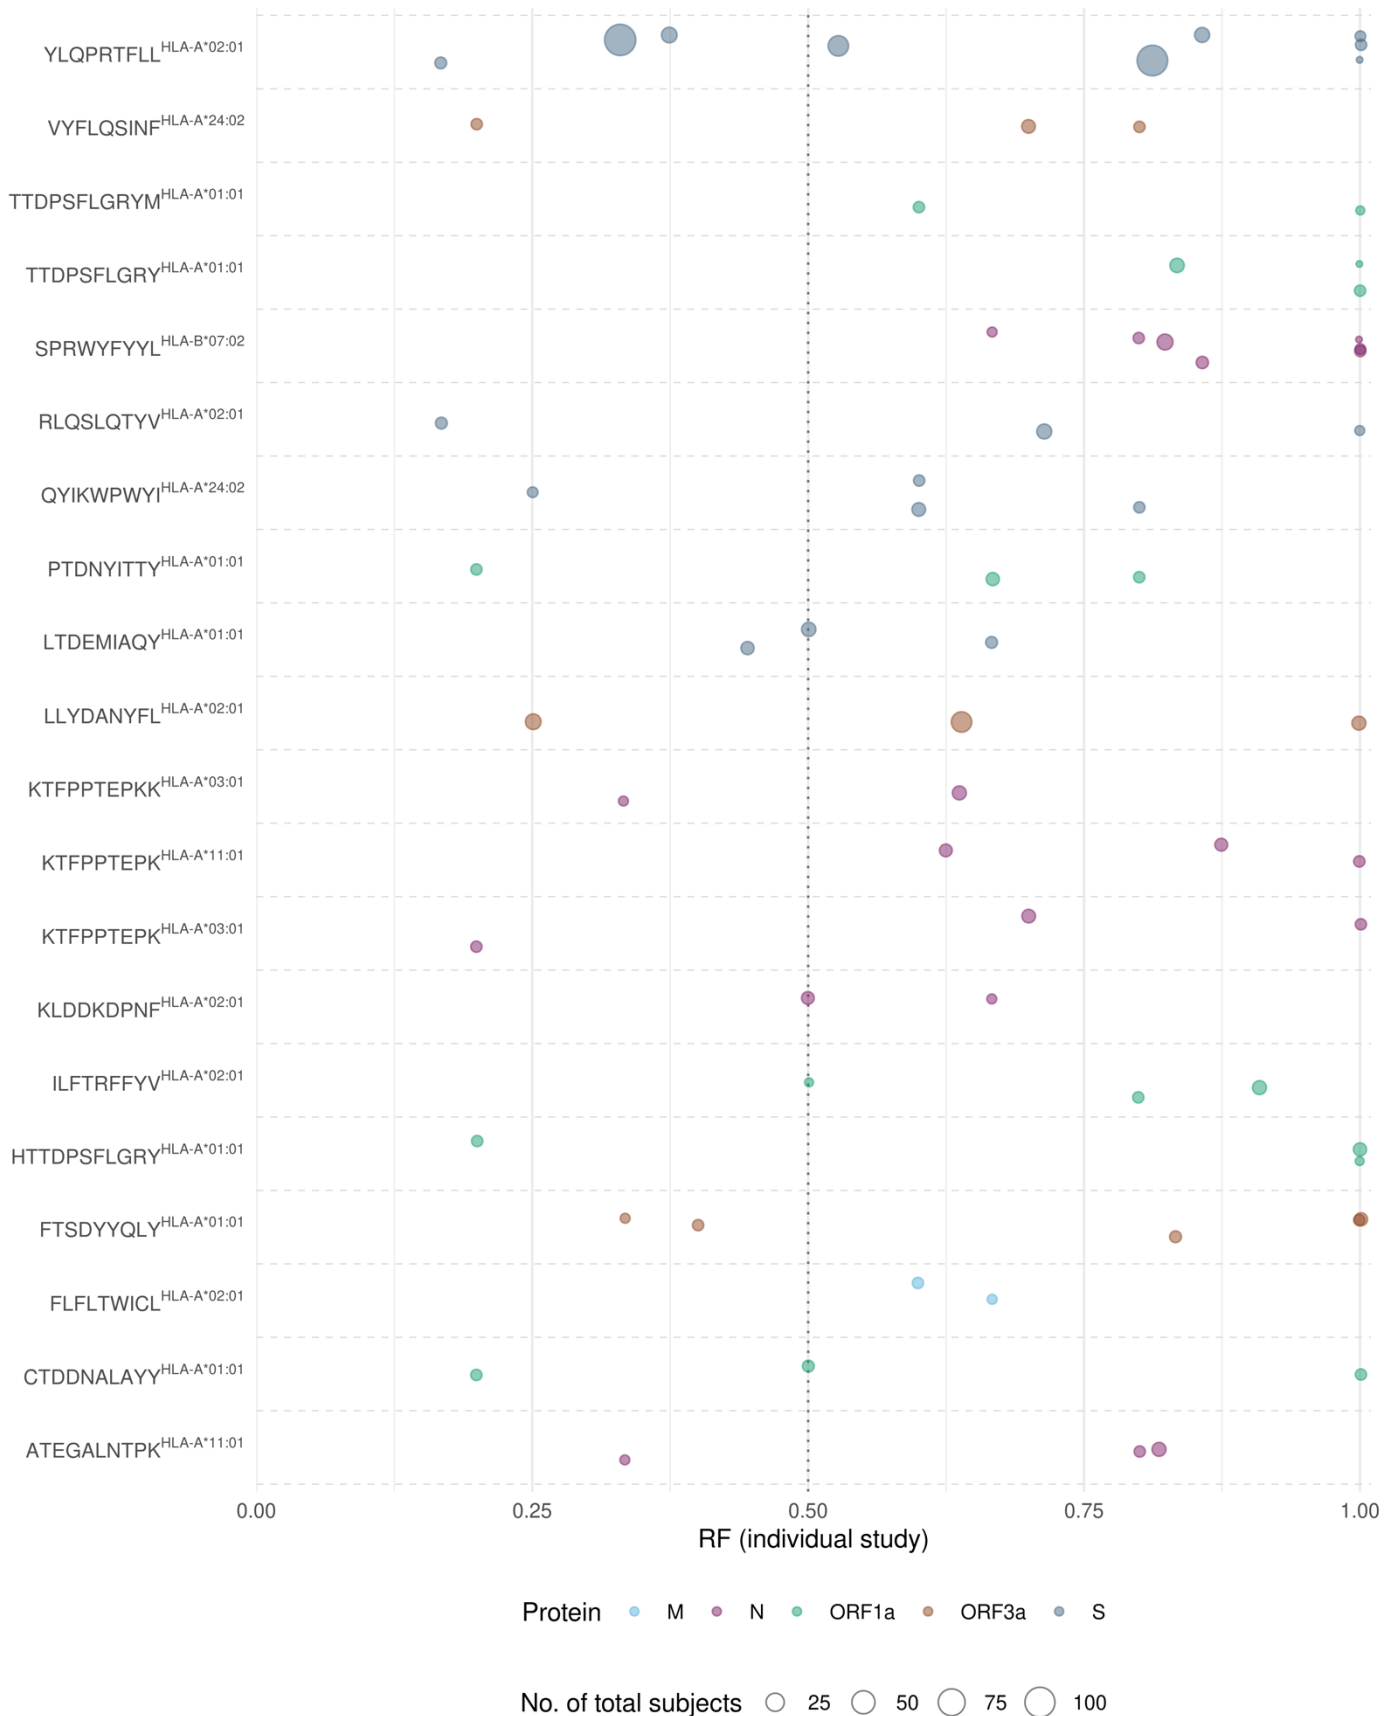

**Figure S2. Response frequencies (RF) of immunoprevalent epitope-HLA pairs per individual study. Related to Figure 2.** For the 20 immunoprevalent epitope-HLA pairs (having RF > 0.5 and reported in more than one study) (Figure 2B), the RF computed per study is represented by circles. The size of these points indicates the total number of subjects that were tested for the specific epitope-HLA pair in a study. Note that each epitope-HLA pair in this set has RF > 0.5 in most of the immunological studies that reported a response against it.

**Table S1. List of S-derived epitopes with conservation less than 0.9 and their association with SARS-CoV-2 variants of concern (VOC). Related to Figure 1B.**

| No. | Epitope         | HLA                         | Start | Stop | Conservation <sup>#</sup> | Mutation <sup>§</sup> | VOC <sup>§</sup>                                         |
|-----|-----------------|-----------------------------|-------|------|---------------------------|-----------------------|----------------------------------------------------------|
| 1   | AYSNNSIAIPTNFTI | HLA-DQB1*03:01              | 706   | 720  | 0.660                     | T716I                 | B.1.1.7                                                  |
| 2   | GVYYHKNNK       | HLA-A*03:01                 | 142   | 150  | 0.649                     | Y144-                 | B.1.1.7, B.1.525                                         |
| 3   | HVSNGTHK        | HLA-A*68:01                 | 69    | 77   | 0.634                     | H69-                  | B.1.1.7, B.1.525                                         |
|     |                 |                             |       |      |                           | V70-                  |                                                          |
| 4   | IAIPTNFTI       | HLA-B*51:01,<br>HLA-B*53:01 | 712   | 720  | 0.661                     | T716I                 | B.1.1.7                                                  |
| 5   | IPTNFTISV       | HLA-B*07:02,<br>HLA-B*51:01 | 714   | 722  | 0.661                     | T716I                 | B.1.1.7                                                  |
| 6   | LPQGFSALEP      | HLA-B*08:01,<br>HLA-B*07:02 | 216   | 223  | 0.851                     | A222V                 | B.1.177<br>(lineage but not currently a VOC)             |
| 7   | NLVRDLPQGFSALEP | HLA-DRB1*03:01              | 211   | 225  | 0.841                     | D215G                 | B.1.351                                                  |
| 8   | NSIAIPTNF       | HLA-B*57:01                 | 710   | 718  | 0.661                     | T716I                 | B.1.1.7                                                  |
| 9   | QTNSPRRAR       | HLA-A*31:01                 | 677   | 685  | 0.621                     | Q677H                 | B.1.525                                                  |
|     |                 |                             |       |      |                           | P681H/<br>P681R       | B.1.1.7 / B.1.617.1, B.1.617.2                           |
| 10  | SPRRARSV        | HLA-B*08:01                 | 680   | 687  | 0.639                     | P681H/<br>P681R       | B.1.1.7 / B.1.617.1, B.1.617.2                           |
| 11  | SPRRARVA        | HLA-B*07:02                 | 680   | 688  | 0.636                     | P681H/<br>P681R       | B.1.1.7 / B.1.617.1, B.1.617.2                           |
| 12  | SVLNDILSR       | HLA-A*68:01                 | 975   | 983  | 0.664                     | S982A                 | B.1.1.7                                                  |
| 13  | VLNDILSRL       | HLA-A*02:01                 | 976   | 984  | 0.664                     | S982A                 | B.1.1.7                                                  |
| 14  | YGFQPTNGV       | HLA-B*51:01                 | 495   | 503  | 0.643                     | N501Y                 | B.1.1.7, B.1.351, P.1                                    |
| 15  | YQDVNCTEV       | HLA-A*02:06                 | 612   | 620  | 0.023                     | D614G                 | B.1.1.7, B.1.351, P.1, P.2,<br>B.1.427, B.1.525, B.1.526 |
| 16  | YYHKNNKSW       | HLA-A*24:02                 | 144   | 152  | 0.636                     | Y144-                 | B.1.1.7, B.1.525                                         |
|     |                 |                             |       |      |                           | W152C                 | B.1.427                                                  |

<sup>#</sup> Computed based on 859,233 genomes.

<sup>§</sup> Information of VOC and their associated mutations was obtained from <https://covariants.org/shared-mutations> (accessed on 11 May 2021).

## REFERENCES

1. Košmrlj, A., Jha, A., Huseby, E.S., Kardar, M., and Chakraborty, A. (2008). How the thymus designs antigen-specific and self-tolerant T cell receptor sequences. *Proc. Natl. Acad. Sci. U. S. A.* *105*, 16671–16676.
2. Ngono, A.E., and Shresta, S. (2019). Cross-reactive T cell immunity to dengue and zika viruses: New insights into vaccine development. *Front. Immunol.* *10*, 1–9.
3. Ahmed, S.F., Quadeer, A.A., and McKay, M.R. (2020). COVIDep: A web-based platform for real-time reporting of vaccine target recommendations for SARS-CoV-2. *Nat. Protoc.* *15*, 2141–2142.
4. Ahmed, S.F., Quadeer, A.A., and McKay, M.R. (2020). Preliminary identification of potential vaccine targets for the COVID-19 coronavirus (SARS-CoV-2) based on SARS-CoV immunological studies. *Viruses* *12*, 254.
